# Supplementary material
Source: PubMed Central journal article supplement (PMC7920809)

## Supplementary Information for

### The serum metabolome of COVID-19 patients is distinctive and predictive

**Supplementary Table 1** The diagnosis of COVID-19-like patients after discharge

| COVID-19-like<br>Patients Number | Gender | Age | Diagnosis                     |
|----------------------------------|--------|-----|-------------------------------|
| Y01                              | Female | 65  | H1N1 infection                |
| Y02                              | Female | 44  | Mycoplasma pneumonia          |
| Y03                              | Female | 77  | Community-acquired pneumonia. |
| Y04                              | Female | 25  | Mycoplasma pneumonia          |
| Y05                              | Male   | 74  | H1N1 infection                |
| Y06                              | Male   | 66  | community-acquired pneumonia. |
| Y07                              | Male   | 85  | H1N1 infection                |
| Y08                              | Male   | 77  | Aspiration pneumonia          |
| Y09                              | Female | 39  | Fever of unknown              |
| Y10                              | Female | 31  | Fever of unknown              |
| Y11                              | Female | 47  | H1N1 infection                |
| Y12                              | Female | 31  | H1N1 infection                |
| Y13                              | Female | 55  | H1N1 infection                |
| Y14                              | Female | 48  | Community-acquired pneumonia. |
| Y15                              | Female | 27  | Fever of unknown              |
| Y16                              | Female | 39  | Fever of unknown              |
| Y17                              | Female | 41  | H1N1 infection                |
| Y18                              | Female | 73  | H1N1 infection                |
| Y19                              | Female | 71  | Acute gastroenteritis         |
| Y20                              | Male   | 54  | Acute cholecystitis           |

|     |        |    |                               |
|-----|--------|----|-------------------------------|
| Y21 | Male   | 41 | H1N1 infection                |
| Y22 | Female | 68 | Fever of unknown              |
| Y23 | Female | 65 | Community-acquired pneumonia. |
| Y24 | Male   | 53 | H1N1 infection                |
| Y25 | Male   | 63 | Mycoplasma pneumonia          |
| Y26 | Male   | 82 | Community-acquired pneumonia. |
| Y27 | Male   | 31 | H1N1 infection                |
| Y28 | Male   | 33 | Community-acquired pneumonia. |
| Y29 | Male   | 83 | H1N1 infection                |
| Y30 | Female | 28 | H1N1 infection                |

---

## **Supplemental figure legends**

**Supplementary Figure 1.** (A) OPLS-DA of the metabolome profiles in COVID-19 patients without comorbidities (n = 48), COVID-19-like patients (n = 30) and HCs (n = 78) (B) OPLS-DA of the metabolome profiles in COVID-19 patients with comorbidities (n=31) and without comorbidities (n = 48), COVID-19-like patients (n = 30) and HCs (n = 78). OPLS-DA of the metabolome profile in COVID-19 patients with hypertension (C, n = 19), diabetes (D, n = 11) or fatty liver disease (E, n=10).

**Supplementary Figure 2.** (A) ROC curves of D-fructose, succinic acid and 2-hydroxybutyric acid for distinguishing COVID-19 patients in the first and second random cohorts. (B) ROC curves of D-fructose, succinic acid, 2-hydroxybutyric acid and the combination of three compounds for distinguishing COVID-19 patients without comorbidities in the rebuild cohort.

**Supplementary Figure 3.** Associations between significantly altered clinical parameters and significantly altered metabolites between at least two groups of COVID-19 patients, COVID-19-like patients and HCs in the discovery and validation cohorts except for the three potential metabolic biomarkers.

**A**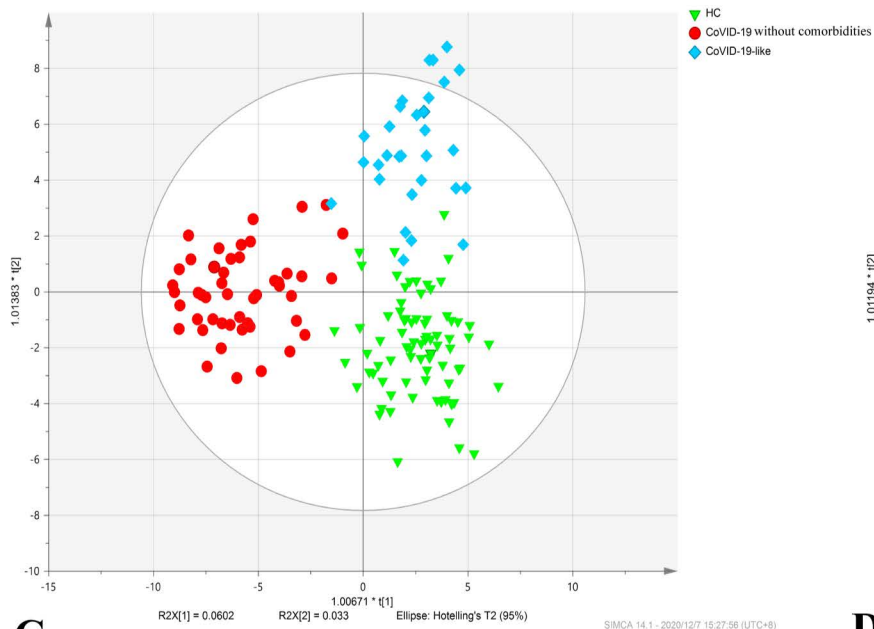**B**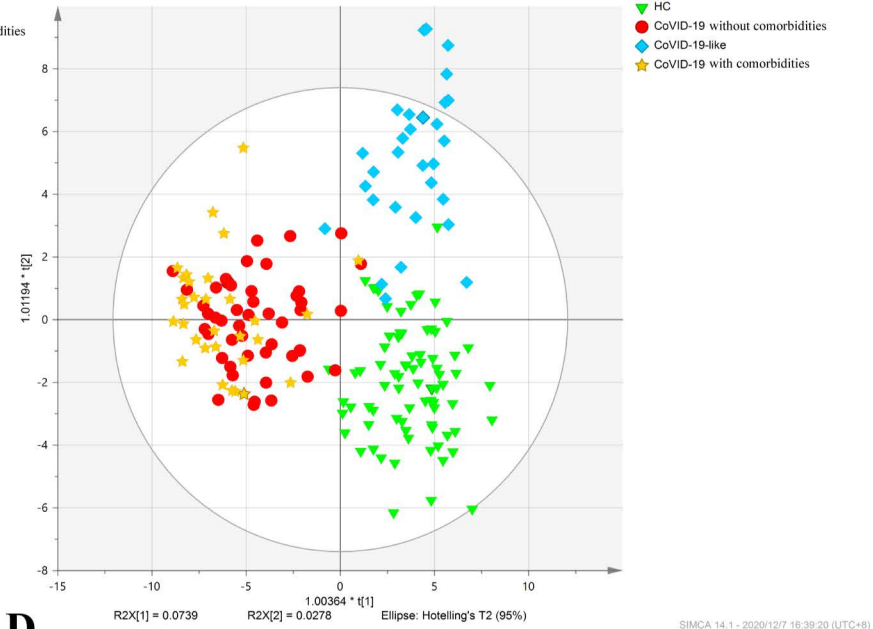**C**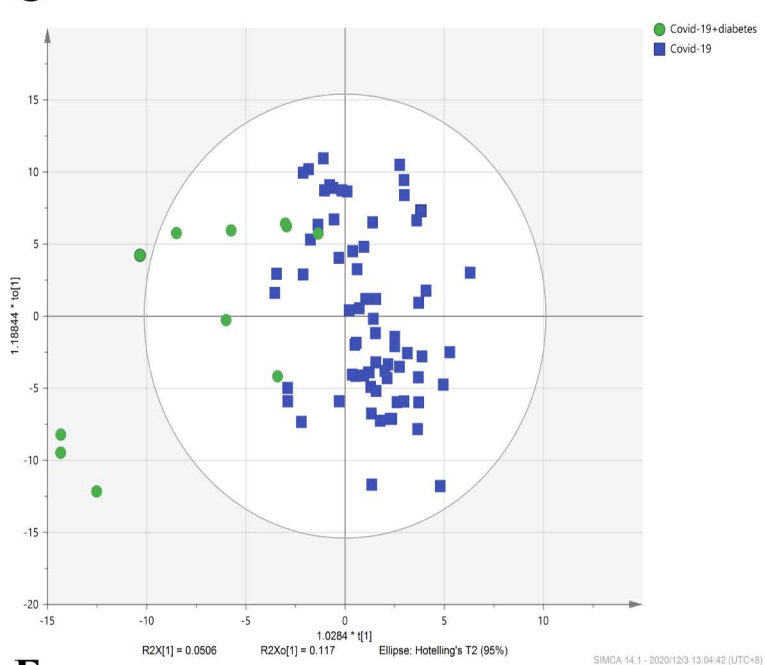**D**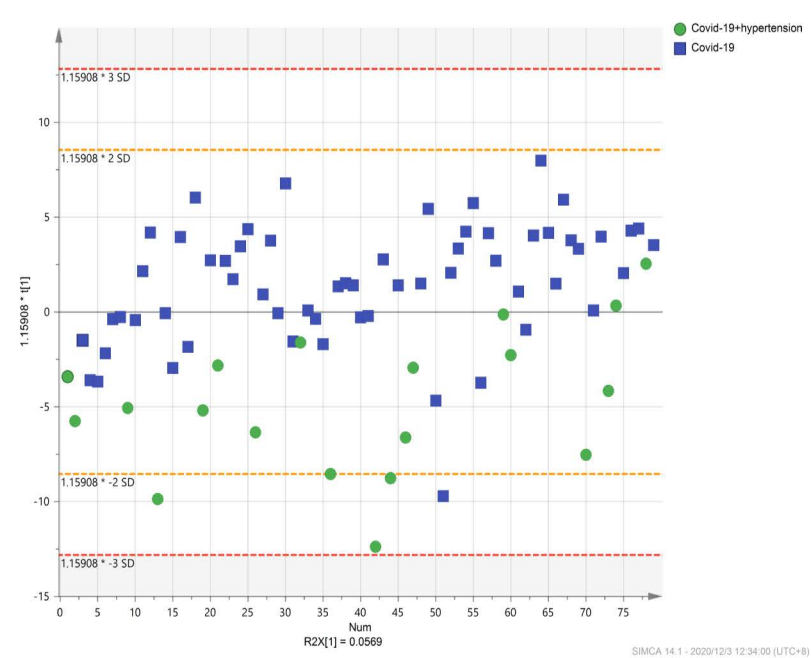**E**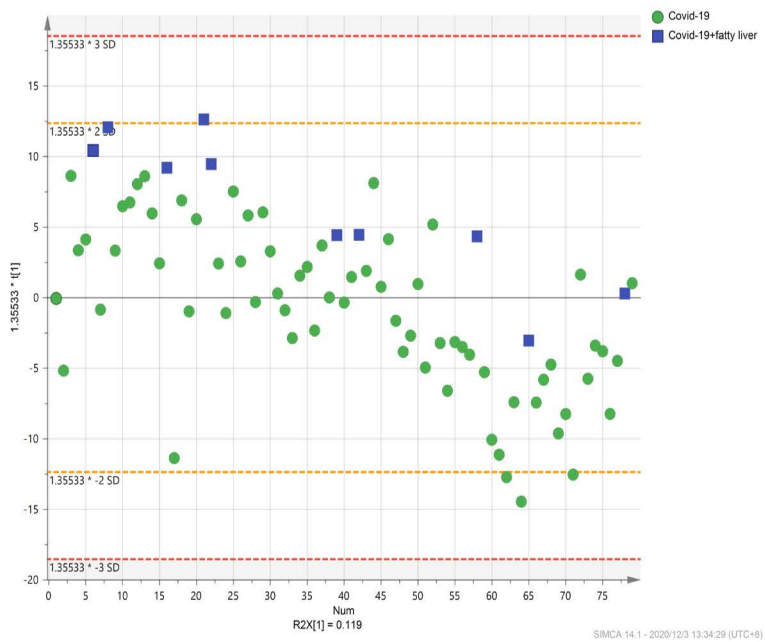**Supplementary Figure 1**

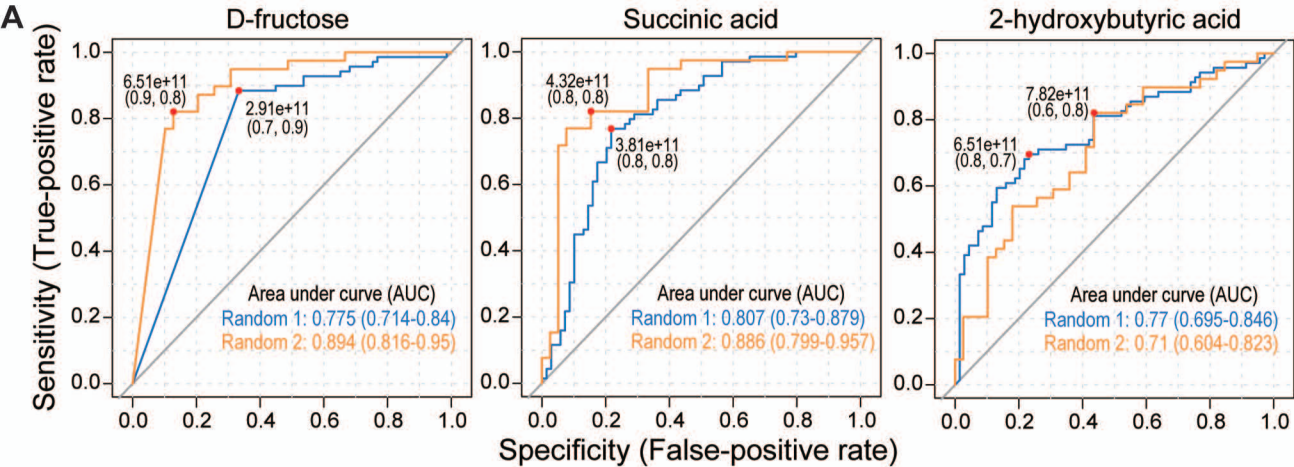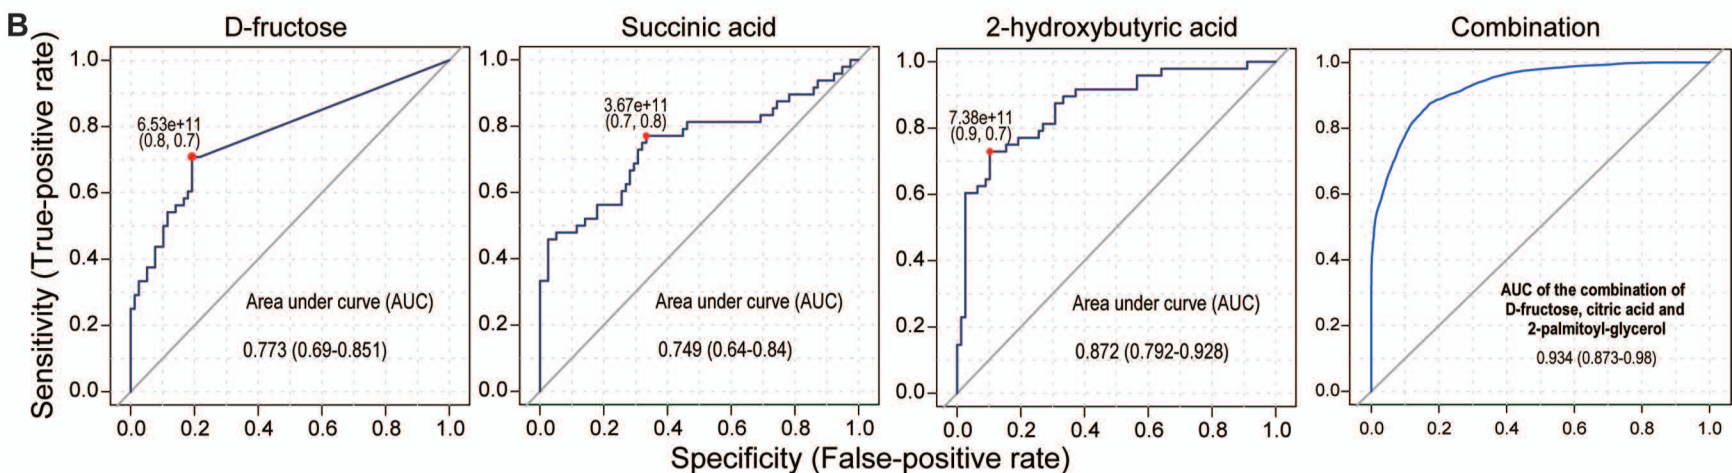

Supplement: mmc2.pdf [file mmc2.pdf]
